# Supplementary material for: Synergistic inhibition of calcium oxalate crystal formation and synergistic protection of HK-2 cells from crystal damage by sulfatedLaminarinpolysaccharide and potassium citrate
Source: Royal Society of Chemistry journal article supplement (doi:10.1039/d3bm00087g), 2023-01-01
Supplement: d3bm00087g1.pdf [file d3bm00087g1.pdf]

*Supplementary Material for*

**Synergistic Inhibition of Calcium Oxalate Crystal Formation and Synergistic Protection of HK-2 Cells from Crystal Damage by Sulfated *Laminarin* Polysaccharide and Potassium Citrate**

Jing-Hong Liu, Jian-Ming Ouyang\*

Institute of Biomineralization and Lithiasis Research, College of Chemistry and Materials Science;  
Jinan University, Guangzhou 510632, China

\*Corresponding author. E-mail address: [toyjm@jnu.edu.cn](mailto:toyjm@jnu.edu.cn)

**This file includes:**

Table S.1.

**Table S.1.**

Monosaccharide composition analysis of polysaccharides\*<sup>1</sup>

| Standard monosaccharide | Peak time / min | Slope  | Fitting degree | Monosaccharide percentage of DLP / % | Monosaccharide percentage of SDLP / % |
|-------------------------|-----------------|--------|----------------|--------------------------------------|---------------------------------------|
| Fuc                     | 4.6335          | 0.5262 | 0.9937         | 1.01                                 | 0.51                                  |
| Ara                     | 9.8918          | 0.7606 | 0.9928         | 0.52                                 | 0.48                                  |
| Rha                     | 10.1752         | 0.5098 | 0.9921         | N* <sup>2</sup>                      | N                                     |
| Gal                     | 12.3252         | 0.8711 | 0.9968         | 0.19                                 | 0.16                                  |
| Glc                     | 14.4668         | 1.0608 | 0.9960         | 93.00                                | 93.16                                 |
| Xyl                     | 17.1335         | 1.0431 | 0.9970         | N                                    | N                                     |
| Man                     | 18.4502         | 0.8177 | 0.9955         | N                                    | N                                     |
| Fru                     | 20.6335         | 0.3754 | 0.9978         | N                                    | N                                     |
| Rib                     | 22.1752         | 0.877  | 0.9978         | N                                    | N                                     |
| Gal-UA                  | 35.2002         | 0.2285 | 0.9967         | 0.25                                 | 0.37                                  |
| Gul-UA                  | 35.8418         | 0.2736 | 0.9978         | 0.42                                 | 0.49                                  |
| Glc-UA                  | 37.9252         | 0.4441 | 0.9971         | 0.50                                 | 0.63                                  |
| Man-UA                  | 40.3418         | 0.0832 | 0.9982         | 4.10                                 | 4.19                                  |

[\*<sup>1</sup>] Fuc: Fucose; Ara: Arabinose; Rha: Rhamnose; Gal: Galactose; Glc: Glucose; Xyl: Xylose; Man: Mannose; Fru: Fructose; Rib: Ribose; Gal-UA: Galacturonic Acid; Gul-UA: Gularonic Acid; Glc-UA: Glucuronic Acid; Man-UA: Mannuronic Acid.

[\*<sup>2</sup>] N: not detected.
